# Supplementary material for: Hybrid perovskite-like iodobismuthates as low-cost and stable anode materials for lithium-ion battery applications
Source: Royal Society of Chemistry journal article supplement (doi:10.1039/d0ta07414d), 2021-01-01
Supplement: d0ta07414d1.pdf [file d0ta07414d1.pdf]

Supporting Information

## Hybrid Perovskite-like Iodobismuthates as Low-cost and Stable Anode Materials for Lithium-ion Battery Applications

Kingshuk Roy,<sup>a,c†</sup> Tianyue Li<sup>b†</sup>, Satishchandra Ogale<sup>\*a,c</sup> and Neil Robertson<sup>\*b</sup>

---

*a Department of Physics and Centre for Energy Science, Indian Institute of Science Education and Research, Pune, India.*

*b School of Chemistry, University of Edinburgh, King's Buildings, David Brewster Road, Edinburgh EH93FJ, Scotland, UK*

*c Research Institute for Sustainable Energy (RISE), TCG Centres for Research and Education in Science and Technology (TCG-CREST), BIPL building, Salt lake Sector V, Kolkata-700091, India*

† These authors contributed equally to this work.

### Experimental Section:

#### Synthesis of IMB, ADB and ATB powder.

For ATB and ADB, a 1:1 molar ratio of aminothiazolium iodide (or 2-amino-1, 3, 4-thiadiazolium for ADB) and bismuth iodide were dissolved separately in water (room temperature) and ethanol (60 °C) before mixing. The reaction was left for 3 hours before drying by a rotary evaporator. For IMB, a 3:2 ratio of imidazolium iodide and bismuth iodide was reacted with the same method above. The as-prepared powders were washed in diethyl ether followed by drying under vacuum.

#### Electrode fabrication:

Electrodes were fabricated by direct mixing of the active materials (Bi based materials), Super-P carbon and Polyvinylidene difluoride (PVDF) binder in a weight ratio of 7:2:1 in a minimum amount of N-methyl 2-pyrrolidone (NMP) solvent followed by coating the mixture onto a conducting Cu foil. It was then dried overnight in an oven at 80°C. We note that Super P carbon does not contribute much to the capacity (~10-20 mAhg<sup>-1</sup>) since the additive weight % is very low.

#### Coin cell fabrication:

2032 coin cells were fabricated using Li metal as one of the electrodes alongside celgard separators. Lithium hexafluorophosphate (LiPF<sub>6</sub>) dissolved in 1:1 mixture of Ethylene Carbonate (EC) and Di-methyl Carbonate (DMC) with a 5% Fluoroethylene Carbonate (FEC) additive was used as the electrolyte. A total amount of 150 µl of electrolyte was used in each coin cell fabrication.

#### Electrochemical characterizations:

Cyclic voltammetry was performed using an Ametek potentiostat at a scan-rate of 0.1 mV/s with vertex potentials of 0.01 and 3 V. The galvanostatic charge discharge measurements were carried out with MTI corporation battery analyzer at variable current densities from 0.05 Ag<sup>-1</sup> to 2 Ag<sup>-1</sup>. The electrochemical impedance spectroscopy (EIS) measurements were studied using the Ametek potentiostat instrument within a frequency range of 300KHz to 100 mHz.

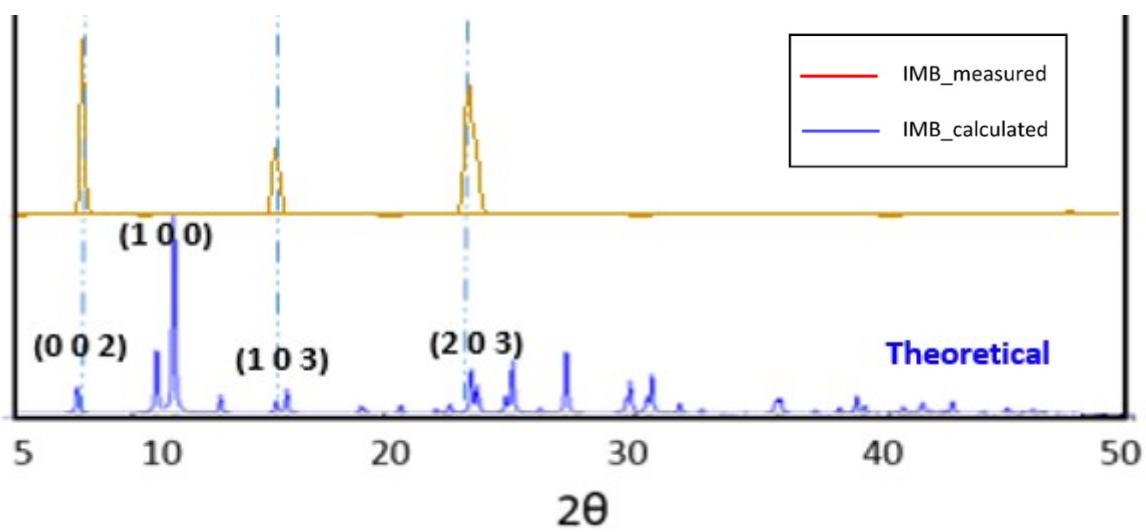

**Fig S1.** Powder XRD data of IMB (Simulated and experimental), with preferred orientation indicated

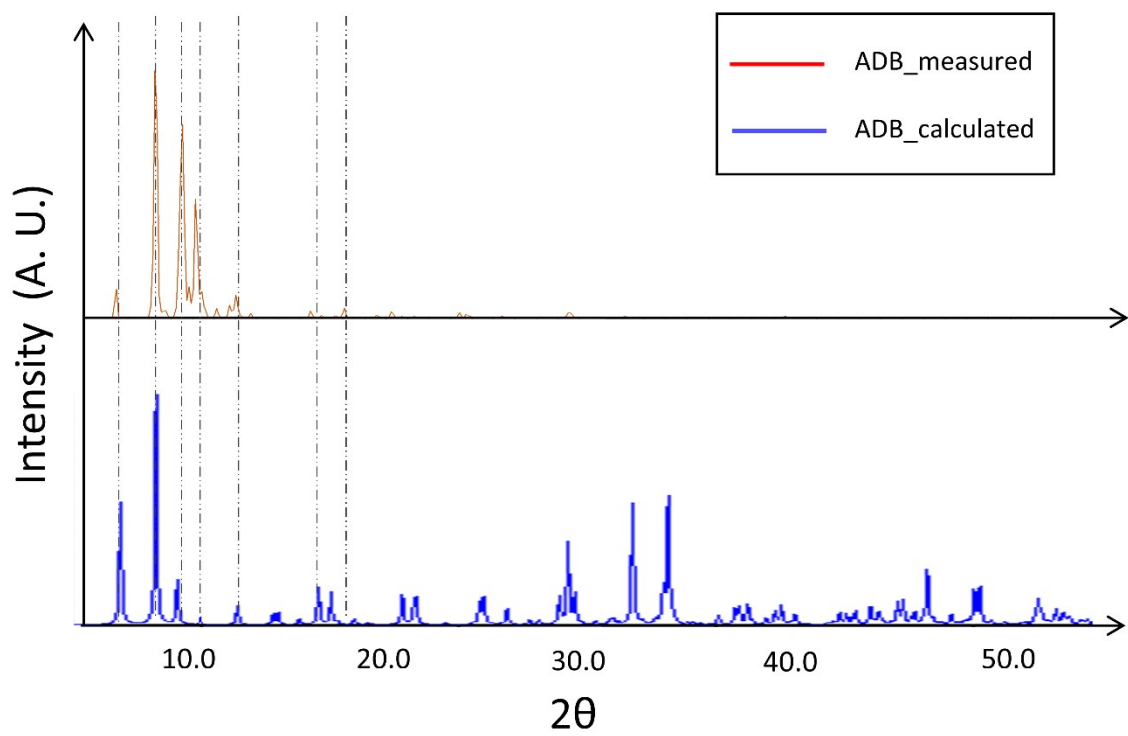

**Fig S2.** Powder XRD data of ADB (Simulated and experimental)

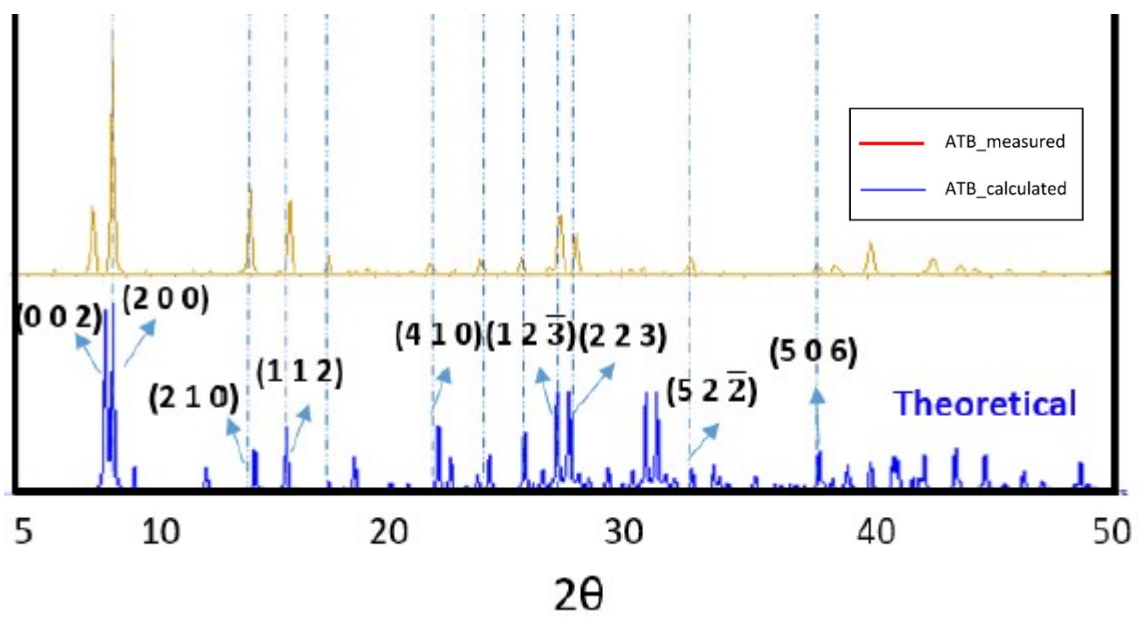

**Fig S3.** Powder XRD data of ATB (Simulated and experimental), with preferred orientation indicated.

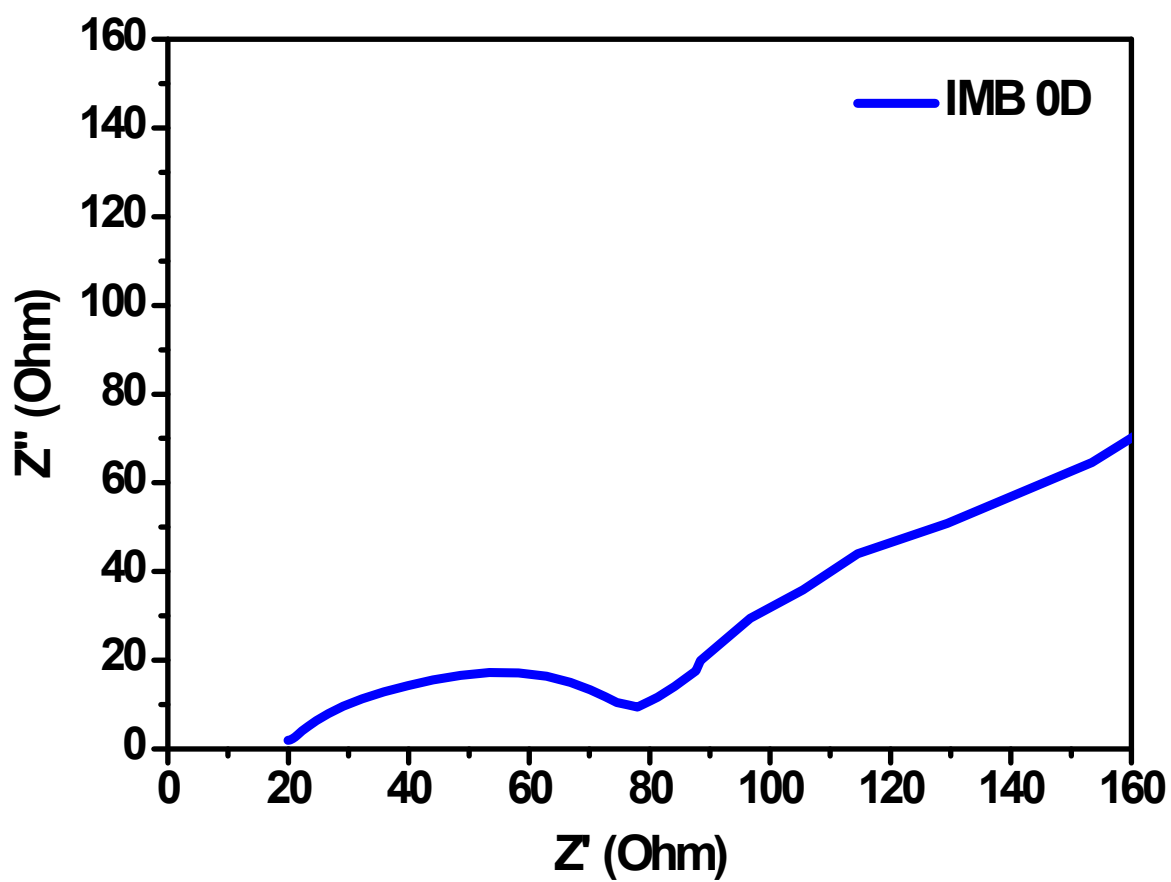

**Fig S4.** Electrochemical impedance spectra of the IMB cell. Frequency range: 300 KHz to 100 mHz

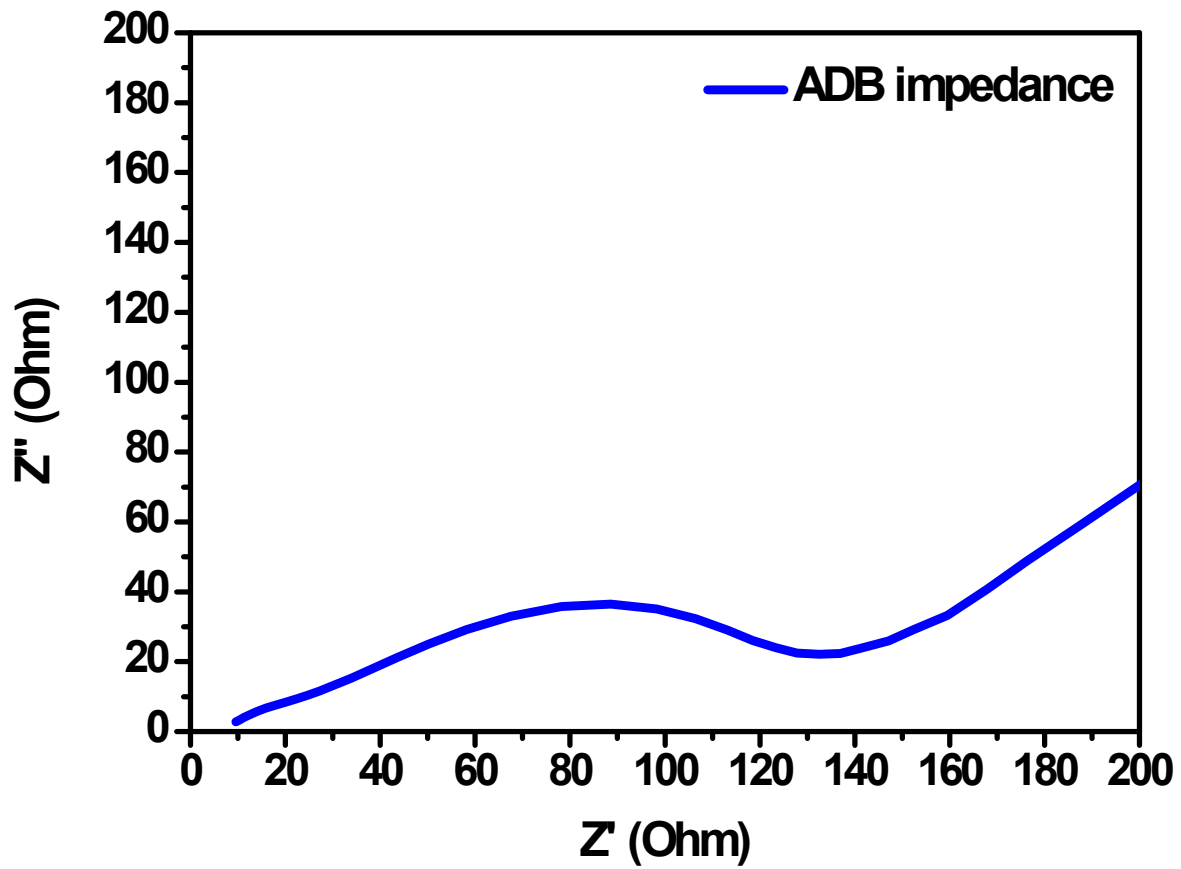

Fig S5. Electrochemical impedance spectra of the ADB cell. Frequency range: 300 KHz to 100 mHz

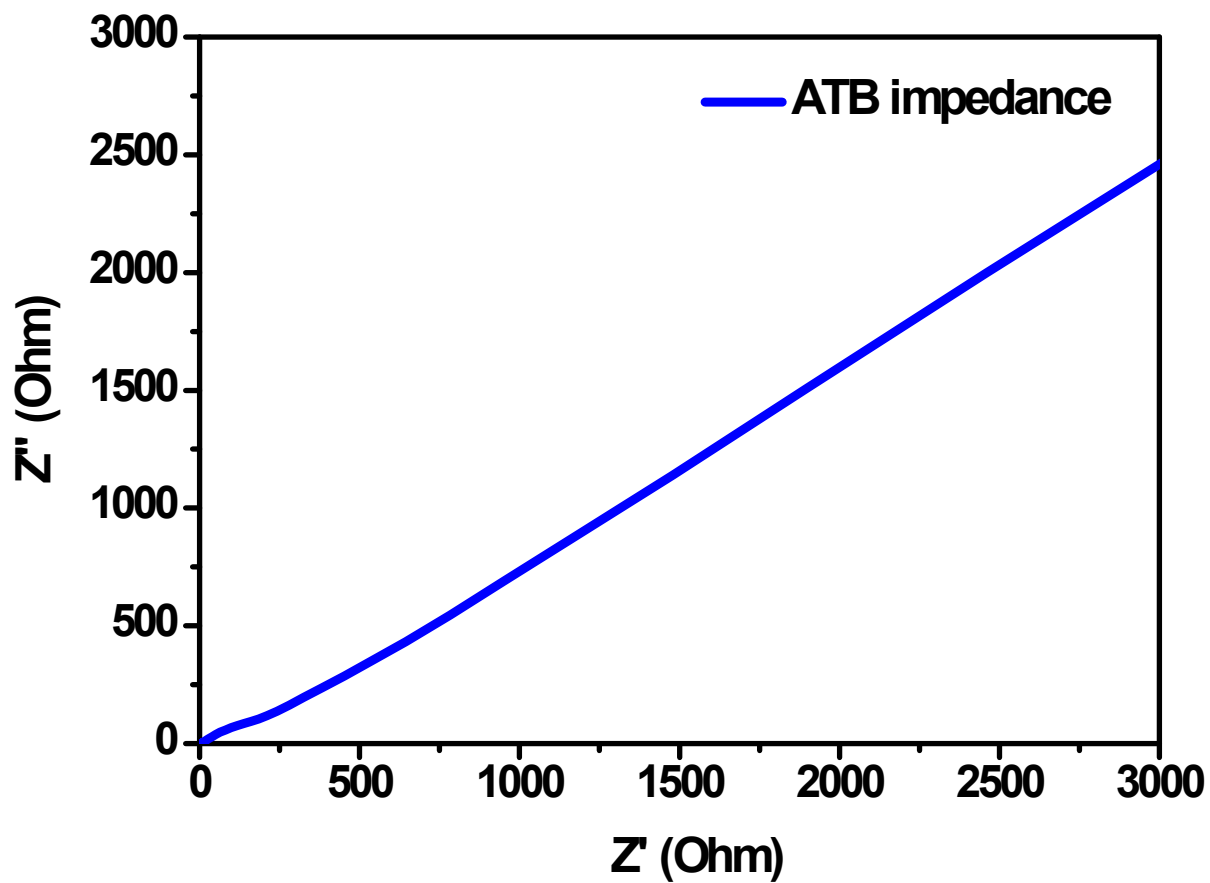

**Fig S6.** Electrochemical impedance spectra of the ATB cell. Frequency range: 300 KHz to 100 mHz

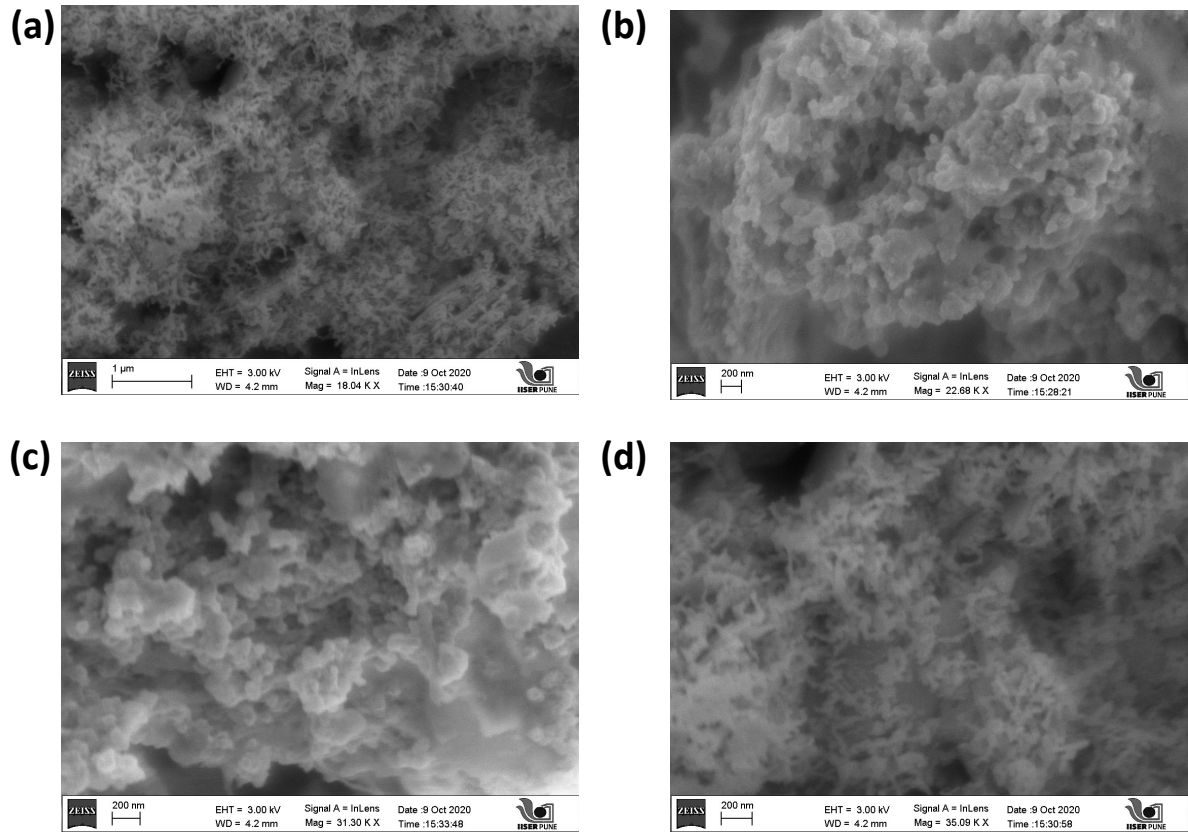

**Fig S7.** FESEM images of the IMB electrode.



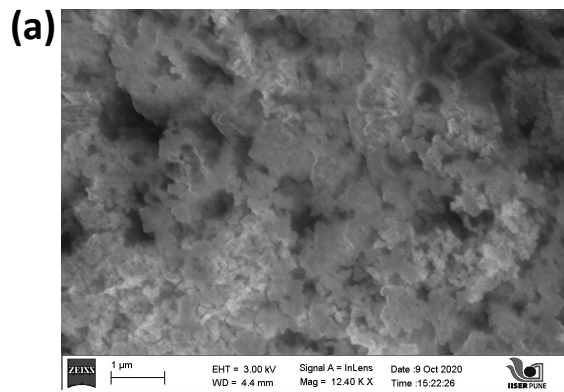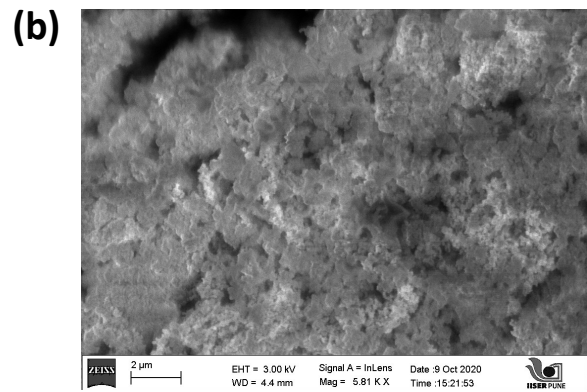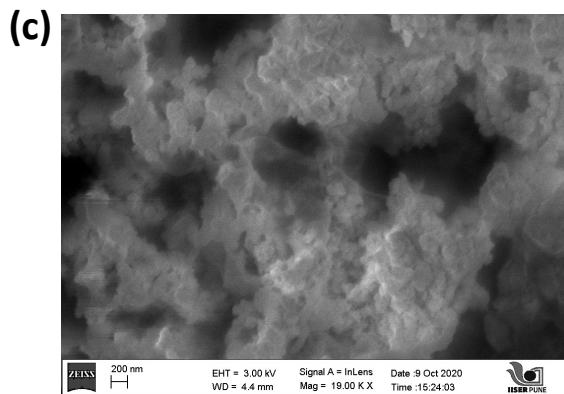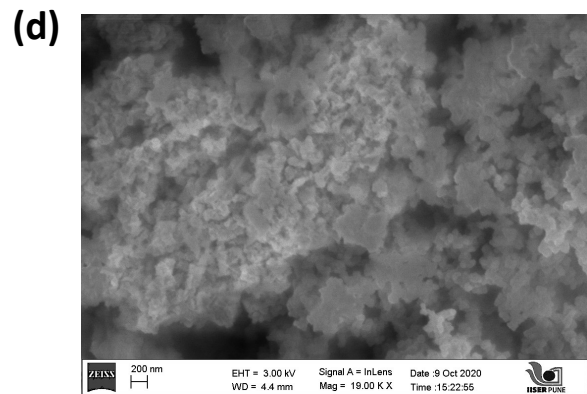

**Fig S8.** FESEM images of the ADB electrode.

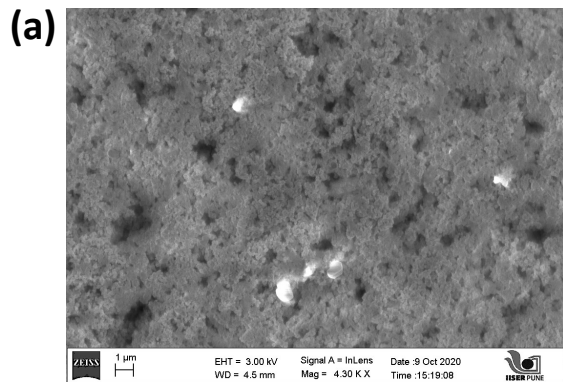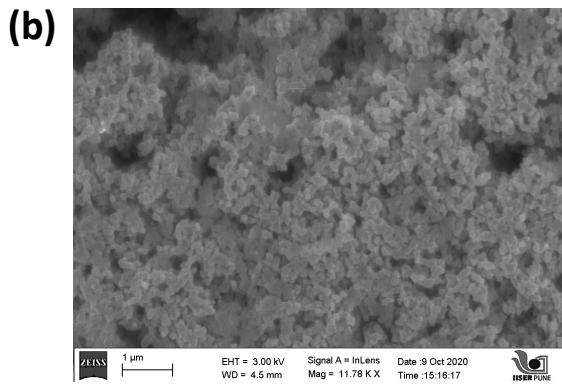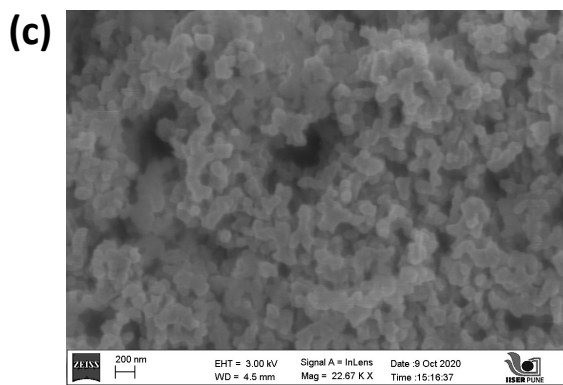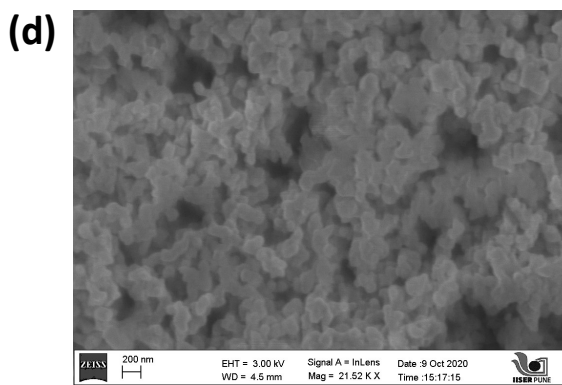

**Fig S9.** FESEM images of the ATB electrode.

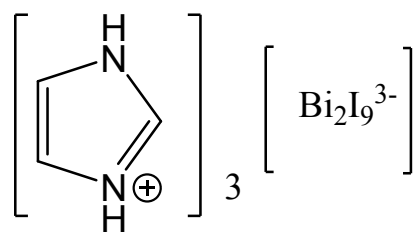

Imidazolium bismuth iodide (IMB);  $[\text{C}_3\text{H}_5\text{N}_2]_3[\text{Bi}_2\text{I}_9]$

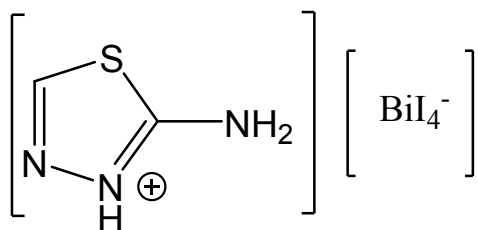

2-amino-1,3,4-dithiazolium bismuth iodide (ADB);  $[\text{C}_2\text{H}_4\text{N}_3\text{S}][\text{BiI}_4]$

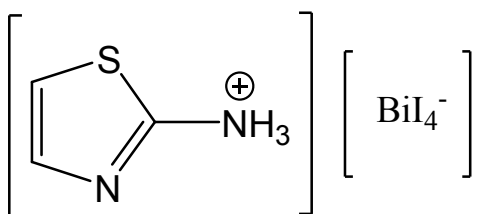

2-aminothiazolium bismuth iodide (ATB);  $[\text{C}_3\text{H}_5\text{N}_2\text{S}][\text{BiI}_4]$

**Fig S10.** Molecular structures of IMB, ADB and ATB.
